# Supplementary material
Source: PubMed Central journal article supplement (PMC4256765)
Supplement: supp_114.171355_171355SI.pdf [file supp_114.171355_171355SI.pdf]

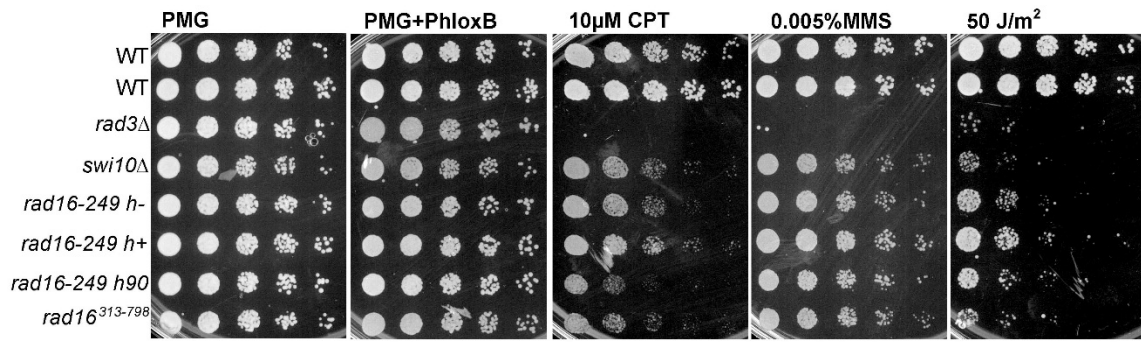

**Figure S1 Long Term Viability in Presence of Drug.** Representative image. Equal concentrations of cells plated in 5x serial dilutions from left to right. Drug plates supplemented with indicated concentration of drug + PhloxinB.

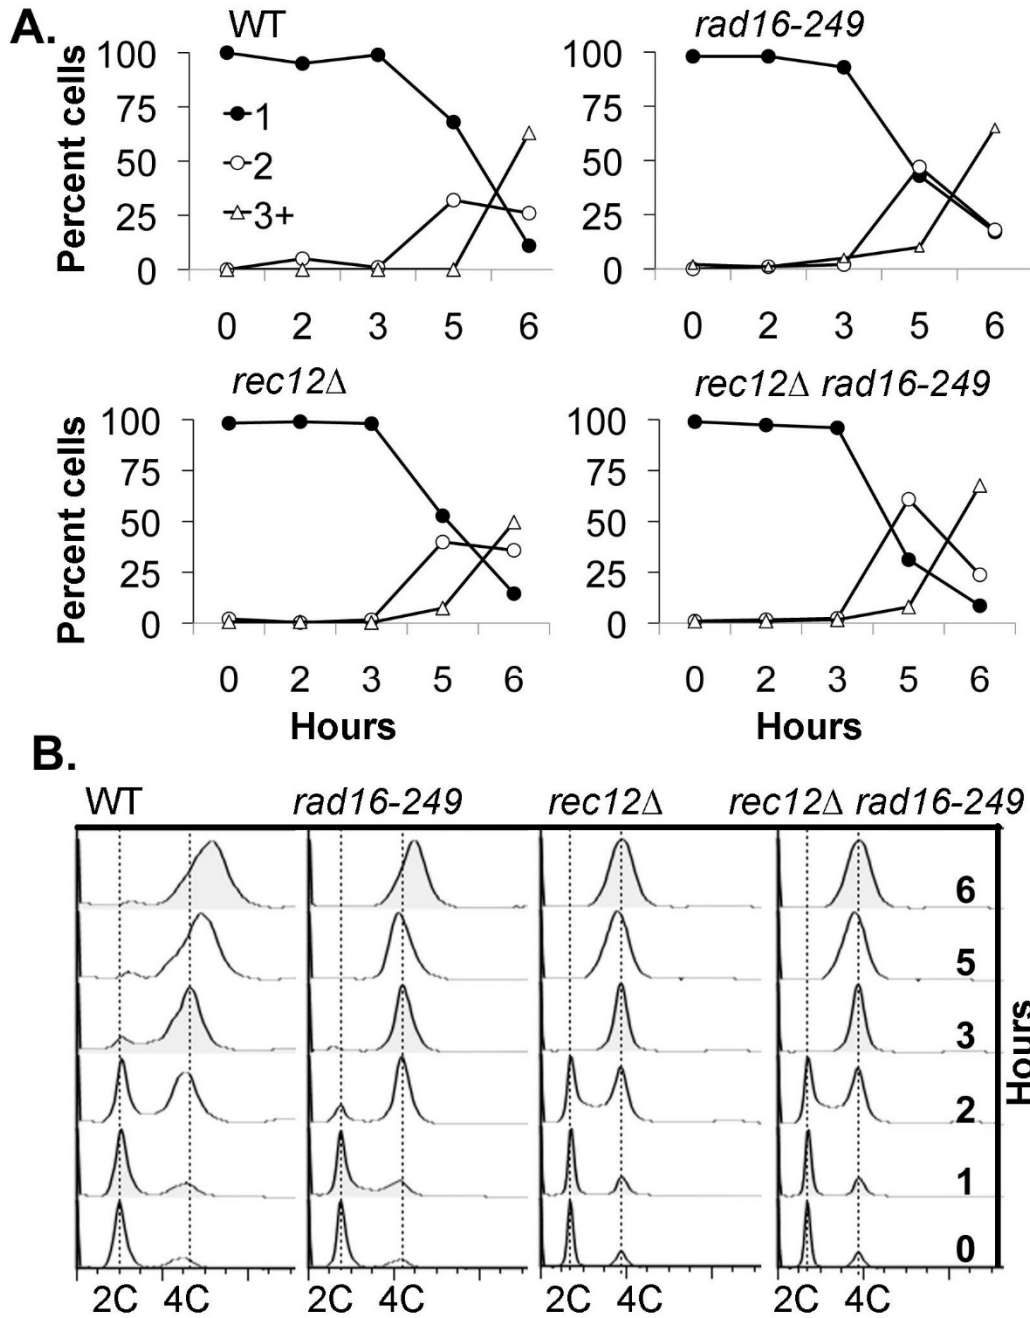

**Figure S2 Timing of Synchronous Meiotic Events.** (A) Nuclear counts visualized with DAPI to determine times of MI (2 signals) and MII (3+ signals) divisions. (B) FACS analysis for samples used in A, B, and C showing the timing and completion of meiotic replication as DNA content moves from 2C to 4C.

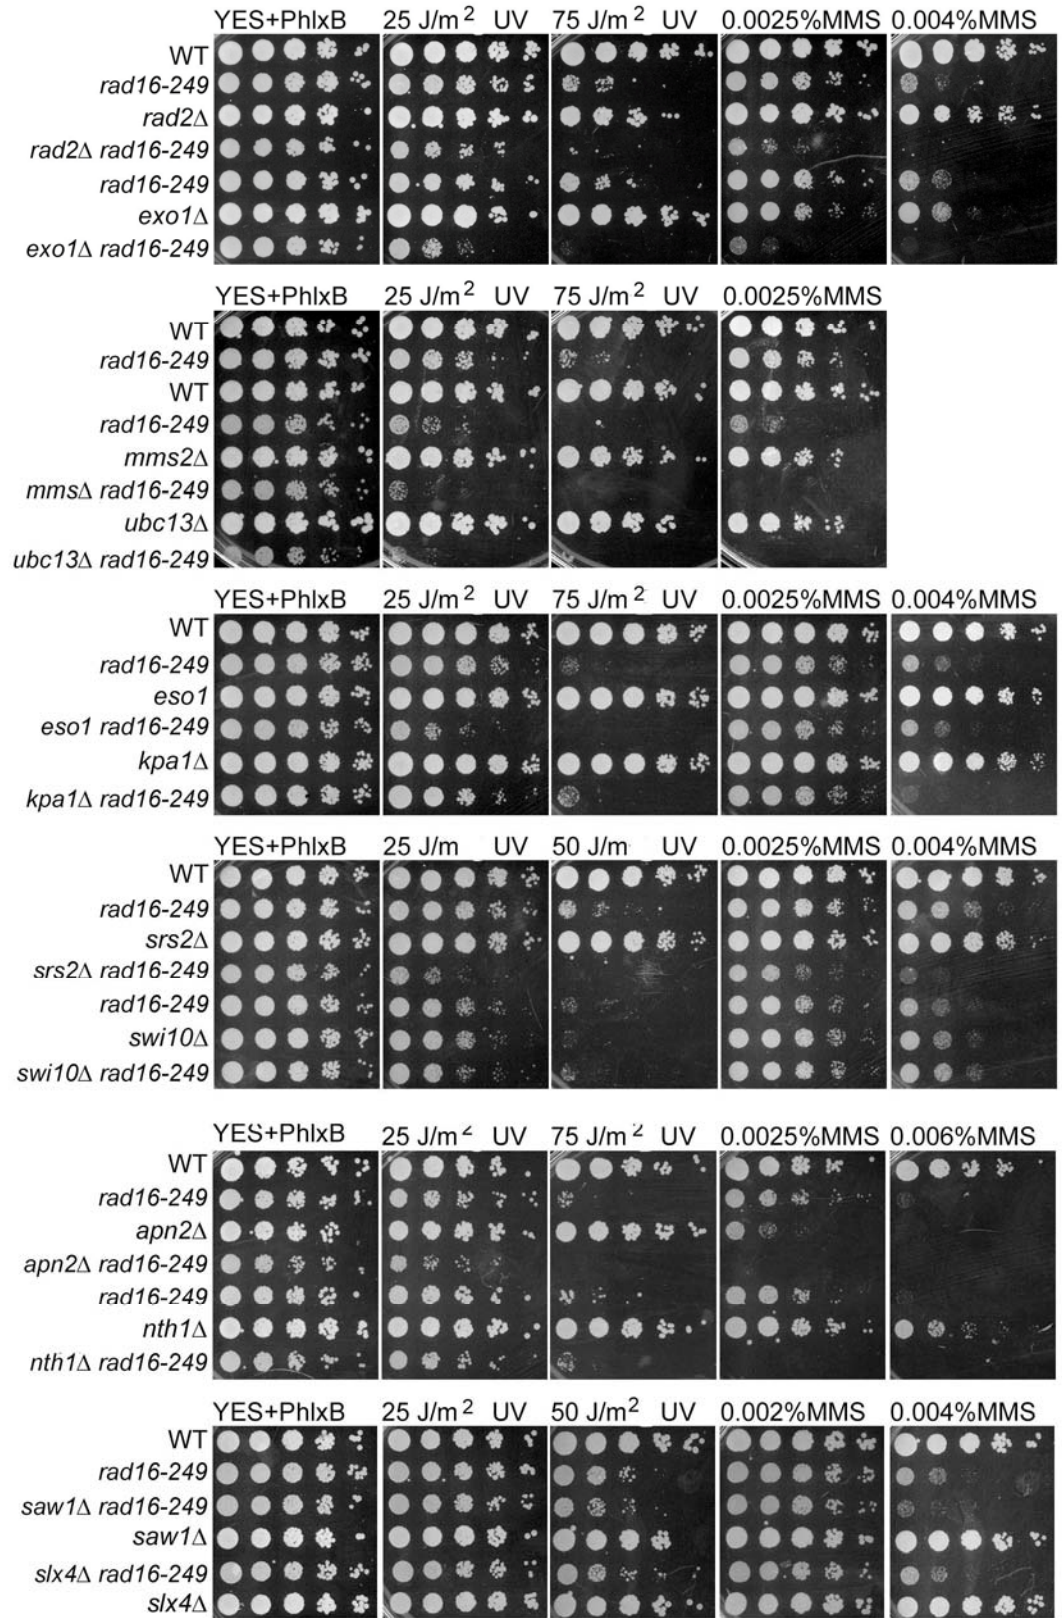

**Figure S3 Growth Rates and Drug Sensitivity for *rad16-249* Double Mutants.** Representative images of cells were plated in 5x serial dilutions from equal starting concentrations on YES plates containing PhloxinB and noted drug concentrations.

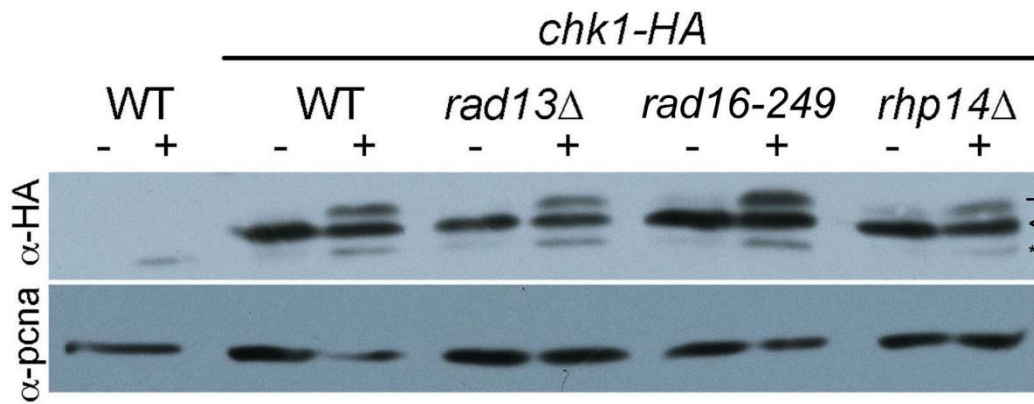

**Figure S4** Western blot of Chk1-HA using 16B12 anti-HA antibody. Lanes (+) 2,4,6,8,10 from cultures exposed to 0.01%MMS for 4 hours; lanes (-) 1,3,5,7,9 from cultures not exposed to drug. \* indicates non specific bands, > is Chk1-HA specific band, < indicates modified Chk1-HA band.

### Files S1-S8

Available for download as .mov files at <http://www.genetics.org/lookup/suppl/doi:10.1534/genetics.114.171355/-/DC1>

**File S1:** Representative of live cell imaging of WT using H3-mRFP (Magenta) and Taz1-GFP (cyan) to view meiotic progression.

**File S2:** Representative of live cell imaging of *rad16-249* using H3-mRFP (magenta) and Taz1-GFP (cyan) to view meiotic progression.

**File S3:** Representative of live cell imaging of *rhp14Δ* using H3-mRFP (magenta) and Taz1-GFP (cyan) to view meiotic progression.

**File S4:** Representative of live cell imaging of *rad13Δ* using H3-mRFP (magenta) and Taz1-GFP (cyan) to view meiotic progression.

**Files S5 and S6:** Representative of live cell imaging of *mus81Δ* using H3-mRFP (magenta) and Taz1-GFP (cyan) to view meiotic progression. Movie 5 shows *mus81Δ* that complete an MI division and Movie 6 shows MI division failure.

**File S7:** Representative of live cell imaging of *rec12Δ* using H3-mRFP (magenta) and Taz1-GFP (cyan) to view meiotic progression.

**File S8:** Representative of live cell imaging of *rad16-249* using H3-mRFP (red) and Taz1-GFP (green) to view mitosis.

**Table S1 Strains used in this study.**

| Strains |                                                                         |                             |
|---------|-------------------------------------------------------------------------|-----------------------------|
| 6       | <i>h- leu1-32 ade6-704 ura4-294</i>                                     | Our Stock                   |
| 118     | <i>h90 ura4-D18 leu1-32 ade6-M216</i>                                   | Our Stock                   |
| 168     | <i>h+ ade6-704 leu1-32</i>                                              | Our Stock                   |
| 416     | <i>h- ade6-704 leu1-32 ura4-D18 rad13::ura4</i>                         | Our Stock                   |
| 421     | <i>h- ade6-704 leu1-32 ura4-D18 Δchk1::ura4</i>                         | Tony Carr                   |
| 527     | <i>h- his3-D1 ade6-M216 ura4-D18 leu1-32</i>                            | Our Stock                   |
| 528     | <i>h+ his3-D1 ade6-M210 ura4-D18 leu1-32</i>                            | Our Stock                   |
| 865     | <i>h- Δcgs1::ura4 ura4-D18 leu1-32</i>                                  | Tony Carr                   |
| 915     | <i>h- leu1-32 ade6-M210</i>                                             | Our Stock                   |
| 941     | <i>h- Δrad2::ura4+ leu1-32 ade6-704 ura4-D18</i>                        | Our Stock                   |
| 1107    | <i>h- Δrad3::ura4+ ura4-D18 leu1-32 ade6-M216</i>                       | Our Stock                   |
| 1251    | <i>h+ ade6-M26 his4-239</i>                                             | Gerry Smith                 |
| 1256    | <i>h- mad2Δ::ura4+ ade6-M210 leu1-32 ura4-D18</i>                       | Our Stock                   |
| 1893    | <i>h- ade6-M375-M210 leu1-32 ura4-D18 his3-D1</i>                       | (Catlett and Forsburg 2003) |
| 1898    | <i>h- rdh54Δ::ura4+ ade6-L469/pUC8/his3+/ade6-M375 ura4-D18 leu1-32</i> | (Catlett and Forsburg 2003) |
| 1902    | <i>h+ ade6-L469/pUC8/his3+/ade6-M375 ura4-D18 leu1-32 his3-D1</i>       | (Catlett and Forsburg 2003) |
| 1942    | <i>h+ rdh54Δ::ura4+ ade6-M375-M210 leu1-32 ura4-D18 his3-D1</i>         | (Catlett and Forsburg 2003) |
| 2057    | <i>h- pat1-114 ade6-M216 can1-1</i>                                     | Our Stock                   |
| 2111    | <i>h- pat1-114 rec12Δ::ura4+ ura4-D18 ade6-M216</i>                     | Our Stock                   |
| 2170    | <i>h90 mat2-102 pat1-114 rec12Δ::ura4+ ura4-D18 ade6-M210</i>           | Our Stock                   |
| 3490    | <i>h- Δswi10::kanMX ura4-D18 leu1-32 ade6-704</i>                       | Tony Carr                   |
| 3500    | <i>h90 mat2-102 pat1-114 ade6-M210</i>                                  | Our Stock                   |
| 3766    | <i>h- Δswi5::his3+ ade6-M210 ura4-D18 leu1-32 his3-D1</i>               | Our Stock                   |
| 3767    | <i>h+ Δswi5::his3+ ade6-M210 ura4-D18 leu1-32 his3-D1</i>               | Our Stock                   |
| 3769    | <i>h+ Δrhp57::ura4+ ade6-M210 ura4-D18 leu1-32 his3-D1</i>              | Our Stock                   |

|      |                                                                 |                  |
|------|-----------------------------------------------------------------|------------------|
| 3770 | <i>h- Δrhp57::ura4+ smt0 ade6-M210 ura4-D18 leu1-32 his3-D1</i> | Our Stock        |
| 3876 | <i>h- apn2::kanMX6 ura4-D18 leu1-32 his3-D1</i>                 | Mathew O'Connell |
| 3877 | <i>h+ nth1::ura4 ura4-D18 leu1-32 his3-D1 arg3-D1</i>           | Mathew O'Connell |
| 3884 | <i>h- exo1::ura4 ura4-D18</i>                                   | Mathew O'Connell |
| 3887 | <i>h- rhp14::kanMX6 ade6-704 leu1-32 ura4-D18</i>               | Mathew O'Connell |
| 3958 | <i>h- rad35-271 ura4-D18 leu1-32</i>                            | Our Stock        |
| 4415 | <i>h+ Δreb1::kanMX ade6-M216 ura4-D18 leu1-32</i>               | Our Stock        |
| 4504 | <i>h+ rad16-249 ura4-D18 leu1-32</i>                            | This Study       |
| 4505 | <i>h+rad16-249 his3-D1 ura4-D18 leu1-32 ade6-M210 =rad16</i>    | This Study       |
| 4561 | <i>h+ Delta-rec12::ura4+ ura4-D18 his4-239 ade6-M26</i>         | This Study       |
| 4562 | <i>h- rad16-249 ura4-D18 ade6-M210</i>                          | This Study       |
| 4661 | <i>h- rad16-249 his3-D1 ura4-D18 leu1-32 ade6-M216</i>          | This Study       |
| 4707 | <i>h- rad16-249 leu1-32 ade6-M210</i>                           | This Study       |
| 4707 | <i>h- rad16-249 leu1-32 ade6-M210</i>                           | This Study       |
| 4708 | <i>h+ rad16-249 leu1-32 ade6-M210</i>                           | This Study       |
| 4839 | <i>h90 Rad16-249 Hht2-GFP-ura4+ ura4-D18 leu1-32 ade6-M216</i>  | This Study       |
| 4941 | <i>h90 ura4-D18 rad16::ura4+</i>                                | Henning Schmidt  |
| 4983 | <i>h+ Δmms2::LEU2+ rad16-249 leu1-32? ura4-D18 ade6-52</i>      | This Study       |
| 4984 | <i>h+ Δsrs2::KanMX6 rad16-249 ura4-D18 ade6-M210</i>            | This Study       |
| 4985 | <i>h- Δkpa1::bleMX6 ura4-D18</i>                                | This Study       |
| 4986 | <i>h- rad16-249 rad35-271 ura4-D18 leu1-32</i>                  | This Study       |
| 4987 | <i>h- rad16-249 Δubc13::ura4+ ura4-D18 ade6-52</i>              | This Study       |
| 5136 | <i>h- Δswi10::kanMX rad16-249 ura4-D18 ade6-704</i>             | This Study       |
| 5146 | <i>h- eso1::kanMX6 rad16-249 ura4-D18 ade6-</i>                 | This Study       |
| 5147 | <i>h- Δkpa1::bleoMX6 rad16-249 ura4-D18 ade6-</i>               | This Study       |
| 5165 | <i>h- apn2::kanMX6 rad16-249 ura4-D18 leu1-32 his3-D1</i>       | This Study       |
| 5166 | <i>h- nth1::ura4+ ura4-D18 rad16-249 ade6-52</i>                | This Study       |

|      |                                                                           |                                |
|------|---------------------------------------------------------------------------|--------------------------------|
| 5172 | <i>h- rad16-249 exo1::ura4 ura4-D18</i>                                   | This Study                     |
| 5176 | <i>h- Δrec12::ura4+ ura4-D18 rad16-249 lys4-95 ade6-52</i>                | This Study                     |
| 5180 | <i>h+ Δrec12::ura4+ siw9-249 ura4-D18 his4-239 ade6-M26</i>               | This Study                     |
| 5181 | <i>h- Δrad2::ura4+ rad16-249 ura4-D18 leu1-32 ade6-</i>                   | This Study                     |
| 5182 | <i>h+ Δsrs2::kanMX6 ura4-D18 ade6-M210</i>                                | This Study                     |
| 5186 | <i>h- Δubc13::ura4+ ura4-D18 ade6-M210</i>                                | This Study                     |
| 5191 | <i>h+ Δmms2::leu2 ura4-D18 ade6-M210</i>                                  | This Study                     |
| 5192 | <i>h+ rad16-249 his4-239 ade6-M26</i>                                     | This Study                     |
| 5193 | <i>h- Δslx4::kanMX4 his3-D1 leu1-32 ura4-D18 ade6-M216</i>                | This Study                     |
| 5194 | <i>h+ rad16-249 ura4-D18 ade6-M210</i>                                    | This Study                     |
| 5204 | <i>h- Δswi10::kanMX ura4-D18 ade6-704</i>                                 | This Study                     |
| 5205 | <i>h- rad16-249 lys4-95 ade6-52</i>                                       | This Study                     |
| 5206 | <i>h- eso1::kanMX6 ura4-D18 ade6-704</i>                                  | This Study                     |
| 5207 | <i>h- lys4-95 ade6-52</i>                                                 | This Study                     |
| 5208 | <i>h- rad16-249 ade6-M210</i>                                             | This Study                     |
| 5221 | <i>h90 mat2-102 pat1-114 rad16-249 ade6-M216</i>                          | This Study                     |
| 5241 | <i>h- rad16-249 Δchk1::ura4 ade6-704 leu1-32 ura4-D18</i>                 | This Study                     |
| 5243 | <i>h- rad16-249 Δcds1::ura4 ura4-D18 leu1-32</i>                          | This Study                     |
| 5245 | <i>h- rad16-249 Δslx4::kanMX4 his3-D1 leu1-32 ura4-D18 ade6-M210</i>      | This Study                     |
| 5247 | <i>h- rad16-249 mad2Δ::ura4+ ura4-D18 leu1-32</i>                         | This Study                     |
| 5257 | <i>h- Δsaw1::kanMX4 his3-D1 ura4-D18 leu1-32 ade6-M216</i>                | This Study-<br>Bioneer derived |
| 5268 | <i>h- Δrec12::ura4+ ura4-D18 ade6-52 lys4-95</i>                          | This Study                     |
| 5287 | <i>h- Δsaw1::kanMX4 rad16-249 his3-D1 ura4-D18 leu1-32 ade6-M216/210?</i> | This Study-<br>Bioneer derived |
| 5497 | <i>h- pat1-114 rad16-249 Drec12::ura4+ ura4-D18 ade6-M216</i>             | This Study                     |
| 5530 | <i>h+ rad16-249 Δreb1::kanMX ade6-M210 leu1-32 ura4-D18</i>               | This Study                     |
| 5580 | <i>h- rhp14::kanMX6 rad16-249 ura4-D18 leu1-32</i>                        | This Study                     |
| 5600 | <i>h90 mat2-102 pat1-114 rad16-249 Drec12::ura4+ ura4-D18 ade6-M210</i>   | This Study                     |



|      |                                                                                           |                            |
|------|-------------------------------------------------------------------------------------------|----------------------------|
| 5800 | <i>h- rad16-249 pat1-114 ade6-M210</i>                                                    | This Study                 |
| 5809 | <i>h+ rad16-249 Δrdh54::ura4+ ade6-M375-M210 leu1-32 ura4-D18 his3-D1</i>                 | This Study                 |
| 5811 | <i>h+ rad16-249 ade6-M375-M210 leu1-32 ura4-D18 his3-D1</i>                               | This Study                 |
| 5814 | <i>h- rad16-249 ade6-L469/pUC8/his3+/ade6-M375 ura4-D18 leu1-32 his3-D1</i>               | This Study                 |
| 5816 | <i>h- rad16-249 Δrdh54::ura4+ ade6-L469/pUC8/his3+/ade6-M375 ura4-D18 leu1-32 his3-D1</i> | This Study                 |
| 5825 | <i>h- rad16-249 ade6-704 leu1-32 ura4-D18 rad13::ura4</i>                                 | This Study                 |
| 6257 | <i>h- Δfml1::natMX4 ura4-D18 his3-D1 leu1-32 ade6-M216</i>                                | Our Stock                  |
| 6258 | <i>h+ Δfml1::natMX4 ura4-D18 his3-D1 leu1-32 ade6-M216</i>                                | Our Stock                  |
| 6915 | <i>h- rad16-249 leu2-120</i>                                                              | This Study                 |
| 6917 | <i>h+ leu2-120 ade6-M210</i>                                                              | This Study                 |
| 6919 | <i>h- his7-36 ade6-</i>                                                                   | This Study                 |
| 6921 | <i>h- rad16-249 his7-36 ade6-</i>                                                         | This Study                 |
| 6923 | <i>h- ura2-10 ade6-</i>                                                                   | This Study                 |
| 6924 | <i>h+ rad16-249 ura2-10 ade6-</i>                                                         | This Study                 |
| 7376 | <i>h- Δrhp57::ura4+ rad16-249 ade6-M210 ura4-D18 leu1-32 his3-D1</i>                      | This Study                 |
| 7377 | <i>h+ Δrhp57::ura4+ rad16-249 ade6-M210 ura4-D18 leu1-32 his3-D1</i>                      | This Study                 |
| 7378 | <i>h- Δswi5::his3+ rad16-249 ade6-M210 ura4-D18 leu1-32 his3-D1</i>                       | This Study                 |
| 7379 | <i>h+ Δswi5::his3+ rad16-249 ade6-M210 ura4-D18 leu1-32 his3-D1</i>                       | This Study                 |
| 7467 | <i>h- rad16-249 Δfml1::natMX4 ura4-D18 his3-D1 leu1-32</i>                                | This Study                 |
| 7468 | <i>h+ rad16-249 Δfml1::natMX4 ura4-D18 his3-D1 leu1-32</i>                                | This Study                 |
| 7475 | <i>h- lys4Δ::kanMX ura4-D18 leu1-32 ade6-</i>                                             | This Study-Bioneer derived |
| 7515 | <i>h- lys4Δ::kanMX rad16-249 ura4-D18 leu1-32 ade6-</i>                                   | This Study-Bioneer derived |

**Table S2 Tetrad analysis of recombination between His4 and Lys4.**

| <b>Viable Spores/Tetrad</b>                   | <b>WT</b> | <b><i>rad16-249</i></b> |
|-----------------------------------------------|-----------|-------------------------|
| 0.00                                          | 0.40%     | 5.66%                   |
| 1.00                                          | 4.37%     | 4.31%                   |
| 2.00                                          | 15.48%    | 15.90%                  |
| 3.00                                          | 7.94%     | 35.04%                  |
| 4.00                                          | 71.83%    | 39.08%                  |
| <b>cM</b>                                     | 7.18      | 11.73                   |
| <b>Relative Viability</b>                     | 100.00%   | 85.90%                  |
| <b>Ratios of Colony Types 4 Spore Tetrads</b> |           |                         |
| <i>his+lys-</i>                               | 224.00    | 207.00                  |
| <i>his+lys-</i>                               | 231.00    | 205.00                  |
| <i>his-lys-</i>                               | 28.00     | 38.00                   |
| <i>his+lys+</i>                               | 28.00     | 36.00                   |

**Table S3 Recombination and spore viability between His4-239 and Lys4-95, and Ade6.**

| Strains     | Genotype                | Total germinated | Spores Plated | Mean Viability Relative to WT | Average cM His4 Lys4 | Average cM Leu2 Ura2 | Average cM His7 Leu1 | Average %ade+ |
|-------------|-------------------------|------------------|---------------|-------------------------------|----------------------|----------------------|----------------------|---------------|
| 1251 x 5107 | WT                      | 8940             | 24600         | 100.00 %                      | 9.07                 | —                    | —                    | 0.40%         |
| 5192 x 5205 | <i>rad16-249</i>        | 7158             | 38600         | 58.87%                        | 11.03                | —                    | —                    | 0.19%         |
| 5268 x 4561 | <i>rec12Δ</i>           | 1041             | 15600         | 14.19%                        | 0                    | —                    | —                    | 0             |
| 5176 x 5180 | <i>rec12Δ rad16-249</i> | 782              | 15600         | 11.35%                        | 0                    | —                    | —                    | 0             |
| 6917 x 6923 | WT                      | 19314            | —             | —                             | —                    | 1.84                 | —                    | —             |
| 6915 x 6924 | <i>rad16-249</i>        | 11409            | —             | —                             | —                    | 5.24                 | —                    | —             |
| 168 x 6919  | WT                      | 8011             | —             | —                             | —                    | —                    | 4.75                 | —             |
| 4707 x 6921 | <i>rad16-249</i>        | 5307             | —             | —                             | —                    | —                    | 7.73                 | —             |

**Table S4 Recombination and spore viability of Ade6 heteroallele.**

|                               | <b>WT</b> | <b><i>rad16-249</i></b> | <b><i>rdh54</i>Δ</b> | <b><i>radh54 rad16-249</i></b> |
|-------------------------------|-----------|-------------------------|----------------------|--------------------------------|
| Total spores counted          | 1399      | 1863                    | 2270                 | 1754                           |
| Total ade+ colonies recovered | 104       | 41                      | 478                  | 256                            |
| STDEV                         | 12.43     | 11.54                   | 5.92                 | 5.18                           |
| STError                       | 6.21      | 5.77                    | 2.96                 | 2.59                           |
| Total plated                  | 7000      | 22000                   | 20000                | 20000                          |
| Relative Viability to WT      | 100.00    | 42.37                   | 56.79                | 43.88                          |
| Average %ade6+                | .48       | .23                     | 1.58                 | 1.0                            |
| Fold Δ                        |           | 1.9                     | 3.5                  | 2.2                            |
| p-value Ade+                  |           | 0.028                   | 0.016                | 0.068                          |
| Average % his+ ade+           | 13.07     | 64.32                   | 18.06                | 18.24                          |
| Fold Δ                        |           | 4.9                     | 1.4                  | 1.4                            |
| p-value His+Ade+              |           | 0.067                   | 0.163                | 0.210                          |

**Table S5 Distribution of cell length measurements binned.**

|             | <b>WT</b> | <b><i>rad16-249</i></b> | <b><i>chk1</i>Δ <i>rad16-249</i></b> |
|-------------|-----------|-------------------------|--------------------------------------|
| 5 - 9.99 μm | 60        | 16                      | 69                                   |
| 10 – 14 μm  | 38        | 39                      | 27                                   |
| > 14 μm     | 2         | 45                      | 4                                    |
| Average     | 9.52      | 14.08                   | 9.22                                 |
| N           | 102       | 127                     | 100                                  |

**Table S6 Analysis of H3-MRFP Taz1-GFP mitotic live cell movies.**

|                                     | <b>WT</b> |       | <b><i>rad16-249</i></b> |       | <b><i>rhp14</i>Δ</b> |       |
|-------------------------------------|-----------|-------|-------------------------|-------|----------------------|-------|
|                                     | counted   | %     | counted                 | %     | counted              | %     |
| Total scored                        | 132       |       | 156                     |       | 97                   |       |
| Normal                              | 131       | 99.24 | 141                     | 90.36 | 88                   | 90.72 |
| Included fragment w/ 1 Taz1 signal  | 0         | 0.00  | 5                       | 3.21  | 1                    | 1.03  |
| Excluded fragment w/out Taz1 signal | 0         | 0.00  | 1                       | 0.64  | 3                    | 3.09  |
| Included fragment w/ 2 Taz1 signals | 0         | 0.00  | 6                       | 3.85  | 0                    | 0.00  |
| Anaphase bridging                   | 1         | 0.76  | 3                       | 1.92  | 4                    | 4.12  |
| Total abnormal                      | 1         | 0.76  | 15                      | 9.62  | 8                    | 8.25  |

**Table S7 Analysis of Rad52 and RPA.**

|                                           | Percent Nuclei with Rad11 foci |    |    |     | Standard Error |      |      |      | 95% Confidence Interval |      |      |      |
|-------------------------------------------|--------------------------------|----|----|-----|----------------|------|------|------|-------------------------|------|------|------|
|                                           | 1                              | 2  | 3+ | Any | 1              | 2    | 3+   | Any  | 1                       | 2    | 3+   | Any  |
| <b>WT</b>                                 | 28                             | 3  | 0  | 31  | 1.04           | 0.39 | 0.15 | 1.08 | 2.04                    | 0.76 | 0.30 | 2.11 |
| <b><i>rad13</i>Δ</b>                      | 26                             | 4  | 0  | 31  | 1.02           | 0.48 | 0.09 | 1.07 | 2.00                    | 0.94 | 0.17 | 2.10 |
| <b><i>rad16-249</i></b>                   | 42                             | 14 | 4  | 60  | 1.14           | 0.81 | 0.46 | 1.13 | 2.24                    | 1.58 | 0.91 | 2.22 |
| <b><i>rhp14</i>Δ</b>                      | 44                             | 15 | 2  | 61  | 1.15           | 0.84 | 0.29 | 1.13 | 2.26                    | 1.64 | 0.58 | 2.21 |
| <b><i>rhp14</i>Δ<br/><i>rad16-249</i></b> | 48                             | 10 | 3  | 60  | 1.16           | 0.69 | 0.39 | 1.13 | 2.27                    | 1.35 | 0.76 | 2.22 |
|                                           | Percent Nuclei with Rad52 foci |    |    |     | Standard Error |      |      |      | 95% Confidence Interval |      |      |      |
|                                           | 1                              | 2  | 3+ | Any | 1              | 2    | 3+   | Any  | 1                       | 2    | 3+   | Any  |
| <b>WT</b>                                 | 25                             | 2  | 0  | 28  | 1.01           | 0.34 | 0.11 | 1.04 | 1.98                    | 0.67 | 0.21 | 2.04 |
| <b><i>rad13</i>Δ</b>                      | 30                             | 5  | 0  | 36  | 1.07           | 0.52 | 0.12 | 1.83 | 2.09                    | 1.02 | 0.24 | 3.58 |
| <b><i>rad16-249</i></b>                   | 41                             | 11 | 2  | 54  | 1.14           | 0.74 | 0.30 | 1.48 | 2.24                    | 1.44 | 0.58 | 2.09 |
| <b><i>rhp14</i>Δ</b>                      | 42                             | 19 | 9  | 71  | 1.14           | 0.92 | 0.67 | 1.55 | 2.24                    | 1.80 | 1.32 | 3.04 |
| <b><i>rhp14</i>Δ<br/><i>rad16-249</i></b> | 43                             | 12 | 5  | 61  | 1.15           | 0.76 | 0.52 | 1.68 | 2.25                    | 1.49 | 1.02 | 3.29 |

**Table S8 Mitotic recombination events in heteroallele spore germination.**

|                  | <b>Total Spores</b> | <b>Ade+</b> | <b>Sectored</b> | <b>% of Total Sectored</b> | <b>% of Ade+ Sectored</b> |
|------------------|---------------------|-------------|-----------------|----------------------------|---------------------------|
| WT               | 4175                | 20          | 2               | 0.048                      | 10                        |
| <i>rad16-249</i> | 1625                | 4           | 2               | 0.12                       | 50                        |
