# Supplementary material
Source: PubMed Central journal article supplement (PMC4256765)
Supplement: supp_114.171355_FigureS1.pdf [file supp_114.171355_FigureS1.pdf]

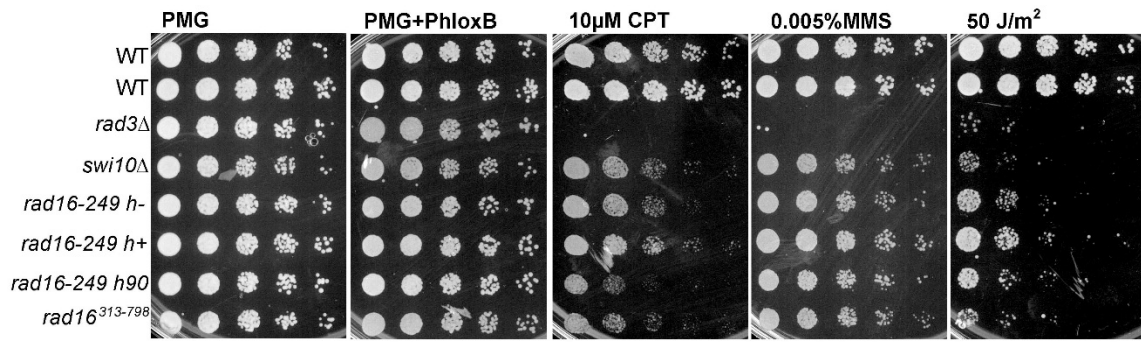

**Figure S1 Long Term Viability in Presence of Drug.** Representative image. Equal concentrations of cells plated in 5x serial dilutions from left to right. Drug plates supplemented with indicated concentration of drug + PhloxinB.
