# Supplementary material
Source: PubMed Central journal article supplement (PMC4256765)
Supplement: supp_114.171355_FigureS2.pdf [file supp_114.171355_FigureS2.pdf]

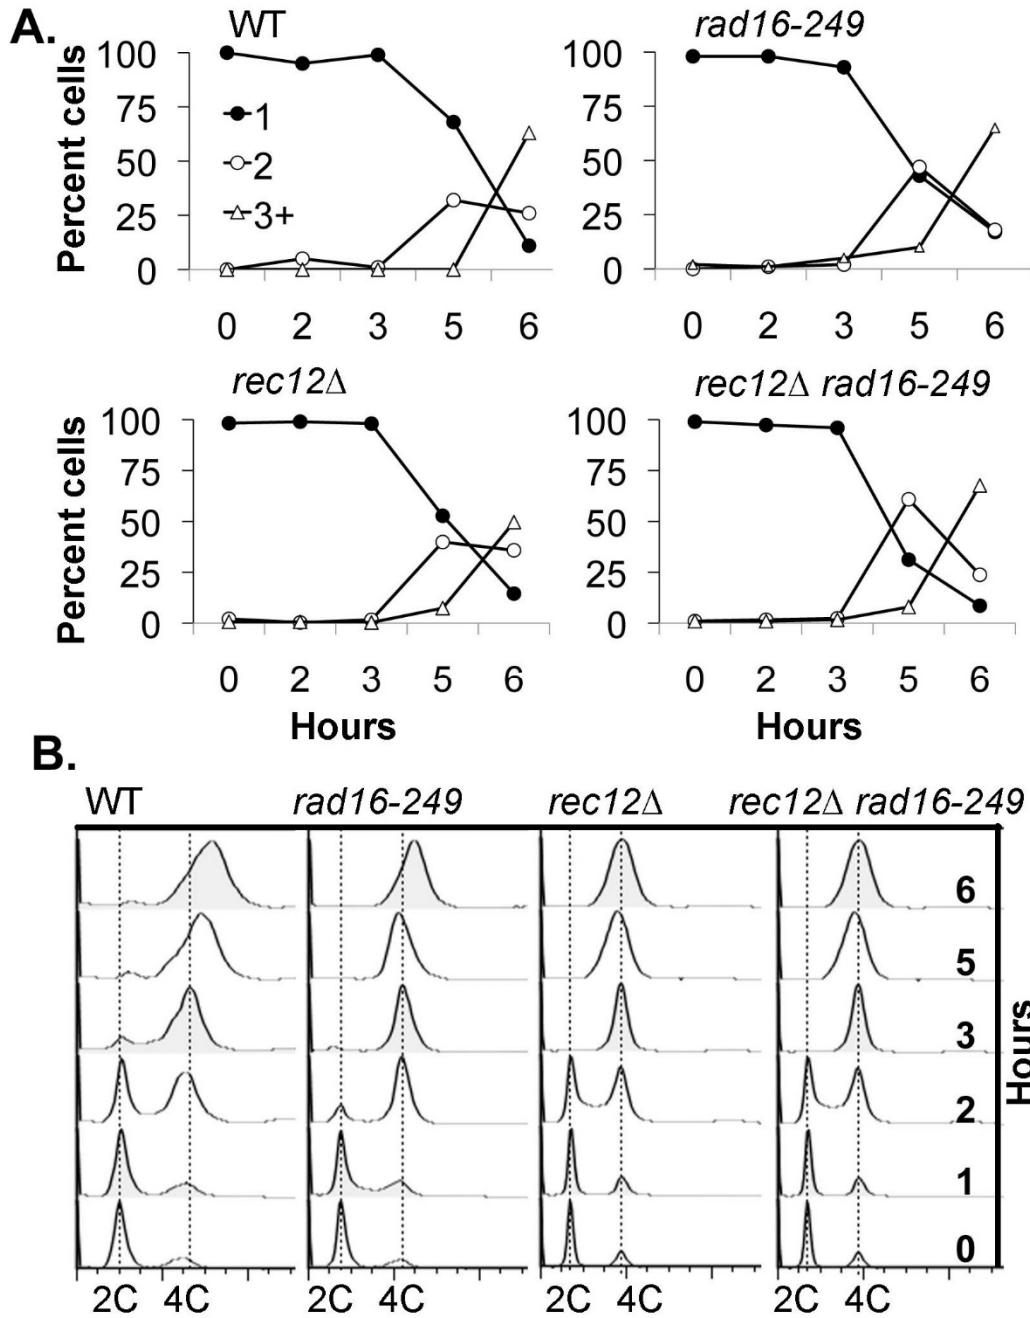

**Figure S2 Timing of Synchronous Meiotic Events.** (A) Nuclear counts visualized with DAPI to determine times of MI (2 signals) and MII (3+ signals) divisions. (B) FACS analysis for samples used in A, B, and C showing the timing and completion of meiotic replication as DNA content moves from 2C to 4C.
