# Supplementary material
Source: PubMed Central journal article supplement (PMC4256765)
Supplement: supp_114.171355_FigureS3.pdf [file supp_114.171355_FigureS3.pdf]

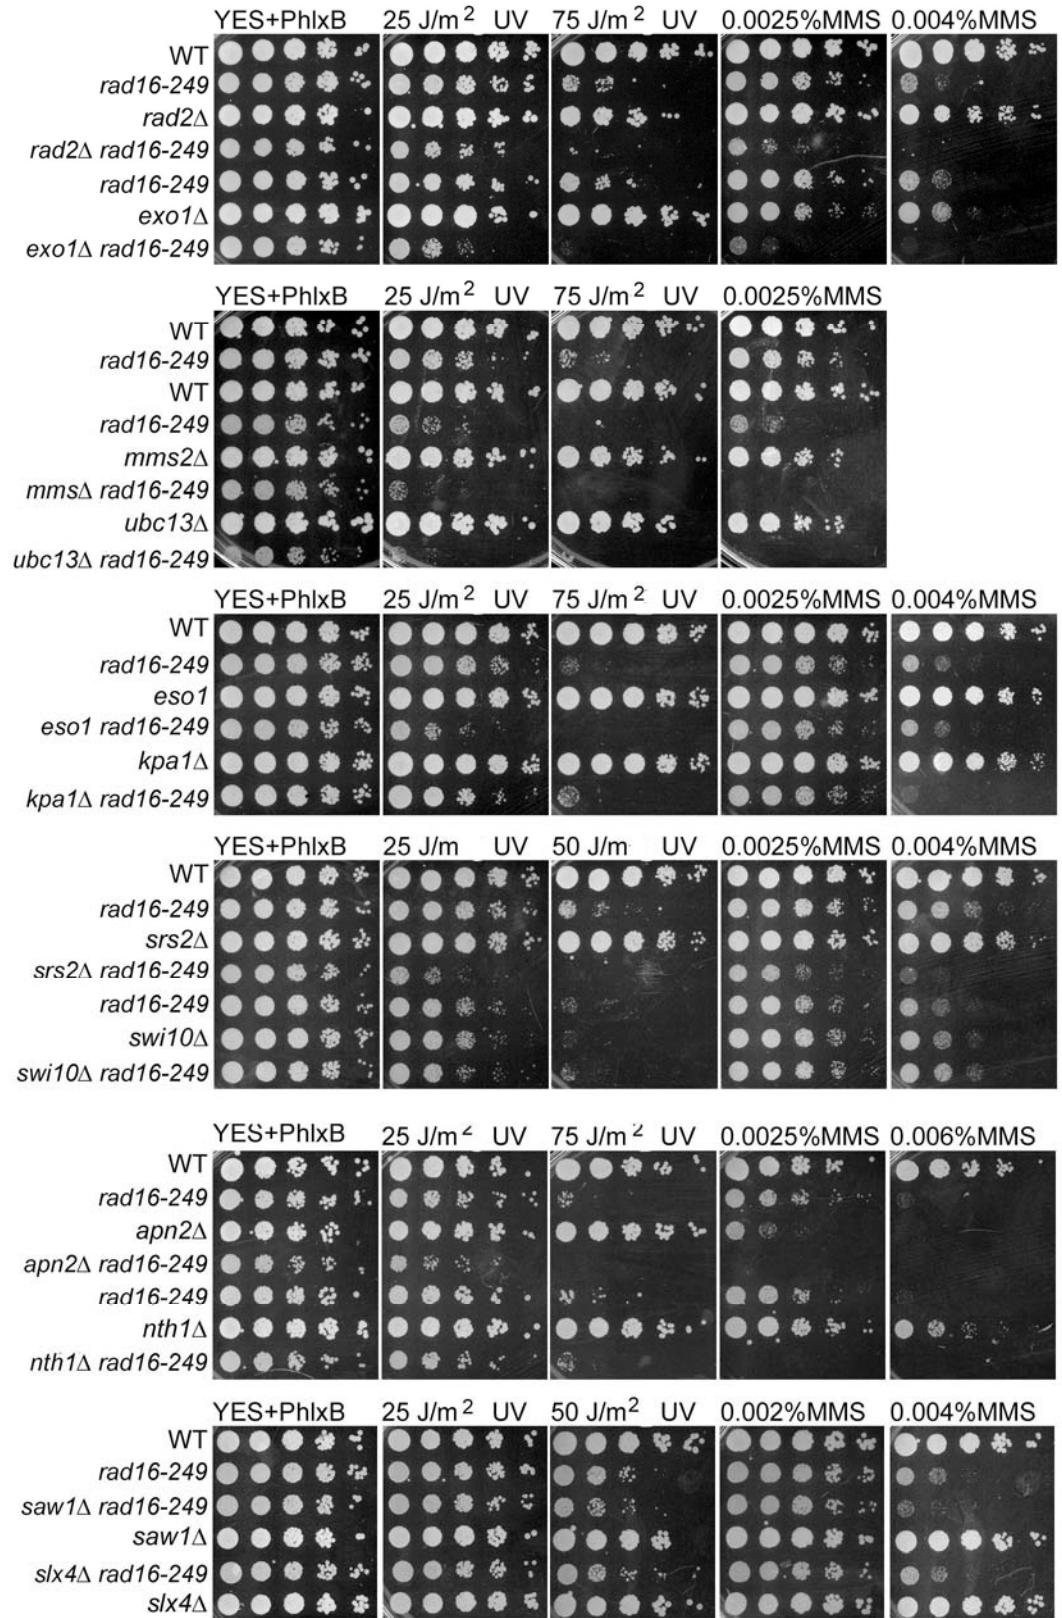

**Figure S3 Growth Rates and Drug Sensitivity for *rad16-249* Double Mutants.** Representative images of cells were plated in 5x serial dilutions from equal starting concentrations on YES plates containing PhloxinB and noted drug concentrations.
