# Supplementary material
Source: PubMed Central journal article supplement (PMC4256765)
Supplement: supp_114.171355_FigureS4.pdf [file supp_114.171355_FigureS4.pdf]

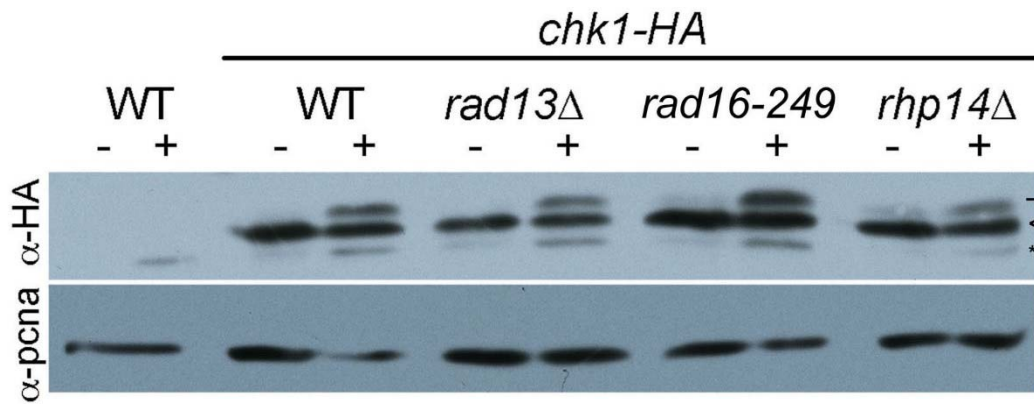

**Figure S4** Western blot of Chk1-HA using 16B12 anti-HA antibody. Lanes (+) 2,4,6,8,10 from cultures exposed to 0.01%MMS for 4 hours; lanes (-) 1,3,5,7,9 from cultures not exposed to drug. \* indicates non specific bands, > is Chk1-HA specific band, ⊣ indicates modified Chk1-HA band.
