# Supplementary material
Source: PubMed Central journal article supplement (PMC4256765)
Supplement: supp_114.171355_TableS2.pdf [file supp_114.171355_TableS2.pdf]

**Table S2 Tetrad analysis of recombination between His4 and Lys4.**

| <b>Viable Spores/Tetrad</b>                   | <b>WT</b> | <b><i>rad16-249</i></b> |
|-----------------------------------------------|-----------|-------------------------|
| 0.00                                          | 0.40%     | 5.66%                   |
| 1.00                                          | 4.37%     | 4.31%                   |
| 2.00                                          | 15.48%    | 15.90%                  |
| 3.00                                          | 7.94%     | 35.04%                  |
| 4.00                                          | 71.83%    | 39.08%                  |
| <b>cM</b>                                     | 7.18      | 11.73                   |
| <b>Relative Viability</b>                     | 100.00%   | 85.90%                  |
| <b>Ratios of Colony Types 4 Spore Tetrads</b> |           |                         |
| <i>his+lys-</i>                               | 224.00    | 207.00                  |
| <i>his+lys-</i>                               | 231.00    | 205.00                  |
| <i>his-lys-</i>                               | 28.00     | 38.00                   |
| <i>his+lys+</i>                               | 28.00     | 36.00                   |
