# Supplementary material
Source: PubMed Central journal article supplement (PMC4256765)
Supplement: supp_114.171355_TableS3.pdf [file supp_114.171355_TableS3.pdf]

**Table S3 Recombination and spore viability between His4-239 and Lys4-95, and Ade6.**

| Strains     | Genotype                | Total germinated | Spores Plated | Mean Viability Relative to WT | Average cM His4 Lys4 | Average cM Leu2 Ura2 | Average cM His7 Leu1 | Average %ade+ |
|-------------|-------------------------|------------------|---------------|-------------------------------|----------------------|----------------------|----------------------|---------------|
| 1251 x 5107 | WT                      | 8940             | 24600         | 100.00 %                      | 9.07                 | —                    | —                    | 0.40%         |
| 5192 x 5205 | <i>rad16-249</i>        | 7158             | 38600         | 58.87%                        | 11.03                | —                    | —                    | 0.19%         |
| 5268 x 4561 | <i>rec12Δ</i>           | 1041             | 15600         | 14.19%                        | 0                    | —                    | —                    | 0             |
| 5176 x 5180 | <i>rec12Δ rad16-249</i> | 782              | 15600         | 11.35%                        | 0                    | —                    | —                    | 0             |
| 6917 x 6923 | WT                      | 19314            | —             | —                             | —                    | 1.84                 | —                    | —             |
| 6915 x 6924 | <i>rad16-249</i>        | 11409            | —             | —                             | —                    | 5.24                 | —                    | —             |
| 168 x 6919  | WT                      | 8011             | —             | —                             | —                    | —                    | 4.75                 | —             |
| 4707 x 6921 | <i>rad16-249</i>        | 5307             | —             | —                             | —                    | —                    | 7.73                 | —             |
