# Supplementary material
Source: PubMed Central journal article supplement (PMC4256765)
Supplement: supp_114.171355_TableS4.pdf [file supp_114.171355_TableS4.pdf]

**Table S4 Recombination and spore viability of Ade6 heteroallele.**

|                               | <b>WT</b> | <b><i>rad16-249</i></b> | <b><i>rdh54</i>Δ</b> | <b><i>radh54 rad16-249</i></b> |
|-------------------------------|-----------|-------------------------|----------------------|--------------------------------|
| Total spores counted          | 1399      | 1863                    | 2270                 | 1754                           |
| Total ade+ colonies recovered | 104       | 41                      | 478                  | 256                            |
| STDEV                         | 12.43     | 11.54                   | 5.92                 | 5.18                           |
| STError                       | 6.21      | 5.77                    | 2.96                 | 2.59                           |
| Total plated                  | 7000      | 22000                   | 20000                | 20000                          |
| Relative Viability to WT      | 100.00    | 42.37                   | 56.79                | 43.88                          |
| Average %ade6+                | .48       | .23                     | 1.58                 | 1.0                            |
| Fold Δ                        |           | 1.9                     | 3.5                  | 2.2                            |
| p-value Ade+                  |           | 0.028                   | 0.016                | 0.068                          |
| Average % his+ ade+           | 13.07     | 64.32                   | 18.06                | 18.24                          |
| Fold Δ                        |           | 4.9                     | 1.4                  | 1.4                            |
| p-value His+Ade+              |           | 0.067                   | 0.163                | 0.210                          |
