# Supplementary material
Source: PubMed Central journal article supplement (PMC4256765)
Supplement: supp_114.171355_TableS5.pdf [file supp_114.171355_TableS5.pdf]

**Table S5 Distribution of cell length measurements binned.**

|             | <b>WT</b> | <b><i>rad16-249</i></b> | <b><i>chk1</i>Δ <i>rad16-249</i></b> |
|-------------|-----------|-------------------------|--------------------------------------|
| 5 - 9.99 μm | 60        | 16                      | 69                                   |
| 10 – 14 μm  | 38        | 39                      | 27                                   |
| > 14 μm     | 2         | 45                      | 4                                    |
| Average     | 9.52      | 14.08                   | 9.22                                 |
| N           | 102       | 127                     | 100                                  |
