# Supplementary material
Source: PubMed Central journal article supplement (PMC4256765)
Supplement: supp_114.171355_TableS6.pdf [file supp_114.171355_TableS6.pdf]

**Table S6 Analysis of H3-MRFP Taz1-GFP mitotic live cell movies.**

|                                     | <b>WT</b> |       | <b><i>rad16-249</i></b> |       | <b><i>rhp14</i>Δ</b> |       |
|-------------------------------------|-----------|-------|-------------------------|-------|----------------------|-------|
|                                     | counted   | %     | counted                 | %     | counted              | %     |
| Total scored                        | 132       |       | 156                     |       | 97                   |       |
| Normal                              | 131       | 99.24 | 141                     | 90.36 | 88                   | 90.72 |
| Included fragment w/ 1 Taz1 signal  | 0         | 0.00  | 5                       | 3.21  | 1                    | 1.03  |
| Excluded fragment w/out Taz1 signal | 0         | 0.00  | 1                       | 0.64  | 3                    | 3.09  |
| Included fragment w/ 2 Taz1 signals | 0         | 0.00  | 6                       | 3.85  | 0                    | 0.00  |
| Anaphase bridging                   | 1         | 0.76  | 3                       | 1.92  | 4                    | 4.12  |
| Total abnormal                      | 1         | 0.76  | 15                      | 9.62  | 8                    | 8.25  |
