# Supplementary material
Source: PubMed Central journal article supplement (PMC4256765)
Supplement: supp_114.171355_TableS7.pdf [file supp_114.171355_TableS7.pdf]

**Table S7 Analysis of Rad52 and RPA.**

|                                    | Percent Nuclei with Rad11 foci |    |    |     | Standard Error |      |      |      | 95% Confidence Interval |      |      |      |
|------------------------------------|--------------------------------|----|----|-----|----------------|------|------|------|-------------------------|------|------|------|
|                                    | 1                              | 2  | 3+ | Any | 1              | 2    | 3+   | Any  | 1                       | 2    | 3+   | Any  |
| <b>WT</b>                          | 28                             | 3  | 0  | 31  | 1.04           | 0.39 | 0.15 | 1.08 | 2.04                    | 0.76 | 0.30 | 2.11 |
| <i>rad13</i> Δ                     | 26                             | 4  | 0  | 31  | 1.02           | 0.48 | 0.09 | 1.07 | 2.00                    | 0.94 | 0.17 | 2.10 |
| <i>rad16-249</i>                   | 42                             | 14 | 4  | 60  | 1.14           | 0.81 | 0.46 | 1.13 | 2.24                    | 1.58 | 0.91 | 2.22 |
| <i>rhp14</i> Δ                     | 44                             | 15 | 2  | 61  | 1.15           | 0.84 | 0.29 | 1.13 | 2.26                    | 1.64 | 0.58 | 2.21 |
| <i>rhp14</i> Δ<br><i>rad16-249</i> | 48                             | 10 | 3  | 60  | 1.16           | 0.69 | 0.39 | 1.13 | 2.27                    | 1.35 | 0.76 | 2.22 |
|                                    | Percent Nuclei with Rad52 foci |    |    |     | Standard Error |      |      |      | 95% Confidence Interval |      |      |      |
|                                    | 1                              | 2  | 3+ | Any | 1              | 2    | 3+   | Any  | 1                       | 2    | 3+   | Any  |
| <b>WT</b>                          | 25                             | 2  | 0  | 28  | 1.01           | 0.34 | 0.11 | 1.04 | 1.98                    | 0.67 | 0.21 | 2.04 |
| <i>rad13</i> Δ                     | 30                             | 5  | 0  | 36  | 1.07           | 0.52 | 0.12 | 1.83 | 2.09                    | 1.02 | 0.24 | 3.58 |
| <i>rad16-249</i>                   | 41                             | 11 | 2  | 54  | 1.14           | 0.74 | 0.30 | 1.48 | 2.24                    | 1.44 | 0.58 | 2.09 |
| <i>rhp14</i> Δ                     | 42                             | 19 | 9  | 71  | 1.14           | 0.92 | 0.67 | 1.55 | 2.24                    | 1.80 | 1.32 | 3.04 |
| <i>rhp14</i> Δ<br><i>rad16-249</i> | 43                             | 12 | 5  | 61  | 1.15           | 0.76 | 0.52 | 1.68 | 2.25                    | 1.49 | 1.02 | 3.29 |
