# Supplementary material
Source: PubMed Central journal article supplement (PMC4256765)
Supplement: supp_114.171355_TableS8.pdf [file supp_114.171355_TableS8.pdf]

**Table S8 Mitotic recombination events in heteroallele spore germination.**

|                  | <b>Total Spores</b> | <b>Ade+</b> | <b>Sectored</b> | <b>% of Total Sectored</b> | <b>% of Ade+ Sectored</b> |
|------------------|---------------------|-------------|-----------------|----------------------------|---------------------------|
| WT               | 4175                | 20          | 2               | 0.048                      | 10                        |
| <i>rad16-249</i> | 1625                | 4           | 2               | 0.12                       | 50                        |
